# Supplementary material
Source: PubMed Central journal article supplement (PMC2862285)
Supplement: NIHMS193615-supplement-1_si_001.pdf [file NIHMS193615-supplement-1_si_001.pdf]

**Supporting Information for:**

**Rates and equilibria for probe capture by an antibody with infinite  
affinity**

Tolulope A. Aweda,<sup>†</sup> Heather Beck,<sup>†</sup> Anna Wu,<sup>‡</sup> Liu Wei,<sup>‡</sup> Wolfgang Weber,<sup>§</sup> and  
Claude F. Meares<sup>†\*</sup>

<sup>†</sup>Chemistry Department, University of California, Davis, California

<sup>‡</sup>Department of Molecular and Medical Pharmacology, David Geffen School of  
Medicine, University of California, Los Angeles, California

<sup>§</sup>Department of Nuclear Medicine, University of Freiburg, Freiburg, Germany

Contents

Key Mathematica instructions for solving Equations 1–4 to prepare for Figure 5.

Key Mathematica instructions for solving Equations 5–9 to prepare for Figure 6.

## Key Mathematica instructions for solving Equations 1–4 to prepare for Figure 5.

Units for numerical calculation

First-order rate const: min<sup>-1</sup>; second-order rate const: conc<sup>-1</sup> min<sup>-1</sup>, where all conc expressed in molecules/ $\mu^3$

a+b->c a+b->cc c->d c->a+b cc->a+b

a=site concn b=DOTA concn c=reactive complex cc=non-reactive complex

d=product

ka1 = .35; kd1 = .42; kirr = i; b0 = 600; a0 = 6000; fxn = j;

```
Do[Do[solution = NDSolve[{
  a'[t] == -ka1 a[t] b[t] + kd1 c[t] + kd1 cc[t],
  b'[t] == -ka1 a[t] b[t] + kd1 c[t] + kd1 cc[t],
  cc'[t] == (1. - j)*ka1 a[t] b[t] - kd1 cc[t],
  c'[t] == j*ka1 a[t] b[t] - i c[t] - kd1 c[t],
  d'[t] == i c[t],
  a[0] == a0, b[0] == b0, c[0] == 0, cc[0] == 0, d[0] == 0}, {a, b, c, cc,
  d}, {t, 0, 150}];
```

```
modelf2d = Function[{t}, Evaluate[First[d[t] /. solution]]];
data2 = {{1, 23}, {2, 30}, {4, 34}, {8, 45}, {16, 66}, {32, 85}, {64,
  95}, {96, 95}, {128, 98}};
v1 = (modelf2d[1]*95/573 - 23)^2;
v2 = (modelf2d[2]*95/573 - 30)^2;
v4 = (modelf2d[4]*95/573 - 34)^2;
v8 = (modelf2d[8]*95/573 - 45)^2;
v16 = (modelf2d[16]*95/573 - 66)^2;
v32 = (modelf2d[32]*95/573 - 85)^2;
v64 = (modelf2d[64]*95/573 - 95)^2;
v96 = (modelf2d[96]*95/573 - 95)^2;
v128 = (modelf2d[128]*95/573 - 98)^2;
sumv = v1 + v2 + v4 + v8 + v16 + v32 + v64 + v96 + v128;
Print[i, " ", j, " ", sumv], {i, 0, 10, .1}], {j, 0, 1, .1}]
```

## Key Mathematica instructions for solving Equations 5–9 to prepare for Figure 6.

u is AABD(Y) concn, c is free receptor concn, v is ligand-receptor reactive complex concn, vv is ligand-receptor non-reactive complex concn, w is covalent product concn.  
radius of capillary=10 $\mu$ , max radius of cord=110 $\mu$ , time minutes, conc molecules/ $\mu^3$

```
difco = 20000;
k1 = .35;
k2 = .42;
kir = 1.5; fxn = .2; preexp = i;
Do[solution =
  NDSolve[{D[u[r, t], t] ==
    difco*(D[u[r, t], r, r] + D[u[r, t], r]/r) - k1*c[r, t]*u[r, t] +
    k2*v[r, t] + k2*vv[r, t],
    D[c[r, t], t] == -k1*c[r, t]*u[r, t] + k2*v[r, t] + k2*vv[r, t],
    D[vv[r, t], t] == (1 - fxn)*k1*c[r, t]*u[r, t] - k2*vv[r, t],
    D[v[r, t], t] == fxn*k1*c[r, t]*u[r, t] - (k2 + kir)*v[r, t],
    D[w[r, t], t] == kir*v[r, t], u[r, 0] == i*Exp[-(r - 10)^2],
    u[10, t] == i*Exp[-0.12*t], (D[u[r, t], r] /. r -> 110) == 0,
    c[r, 0] == 28.2, vv[r, 0] == 0, vv[10, t] == 0, v[r, 0] == 0,
    v[10, t] == 0, w[r, 0] == 0, w[10, t] == 0}, {u, c, vv, v, w}, {r, 10,
    110}, {t, 0, 60},
  Method -> {"MethodOfLines",
    "SpatialDiscretization" -> {"TensorProductGrid",
    "DifferenceOrder" -> "Pseudospectral"} }];
```

```
toall = Table[
  1.67*10^-4*
  NIntegrate[
    Evaluate[
      First[u[r, ti] /. solution]*r + First[vv[r, ti] /. solution]*r +
      First[v[r, ti] /. solution]*r + First[w[r, ti] /. solution]*r,
      {r, 10, 110}, WorkingPrecision -> 24, PrecisionGoal -> 10,
      MaxRecursion -> 40], {ti, 60}];
sumvar = (toall[[1]]/.103256 - 3.8)^2 + (toall[[5]]/.103256 -
  5.2)^2 + (toall[[10]]/.103256 - 6.4)^2 + (toall[[20]]/.103256 -
  6.6)^2 + (toall[[30]]/.103256 - 6.7)^2 + (toall[[40]]/.103256 -
  7.5)^2 + (toall[[50]]/.103256 - 7.1)^2 + (toall[[60]]/.103256 - 7.7)^2;
Print[i, " ", sumvar, " ", toall[[1]]/.103256, toall[[5]]/.103256,
  toall[[10]]/.103256, toall[[20]]/.103256, toall[[30]]/.103256,
  toall[[40]]/.103256, toall[[50]]/.103256, toall[[60]]/.103256, {i, 0.05,
  0.7, .05}]
```
